# Supplementary material for: Genetic Characterization and Pathogenesis of H5N1 High Pathogenicity Avian Influenza Virus Isolated in South Korea during 2021–2022
Source: MDPI journal article supplement (doi:10.3390/v15061403), 2023-06-20
Supplement: s1 [file s1]

(A)

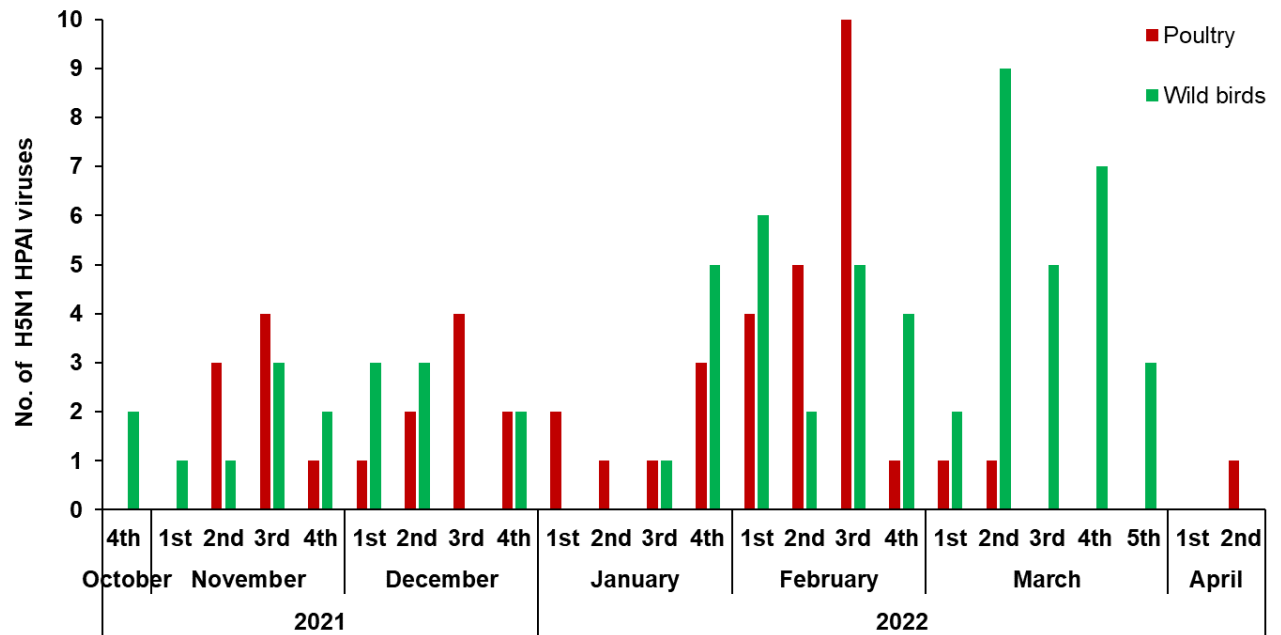

(B)

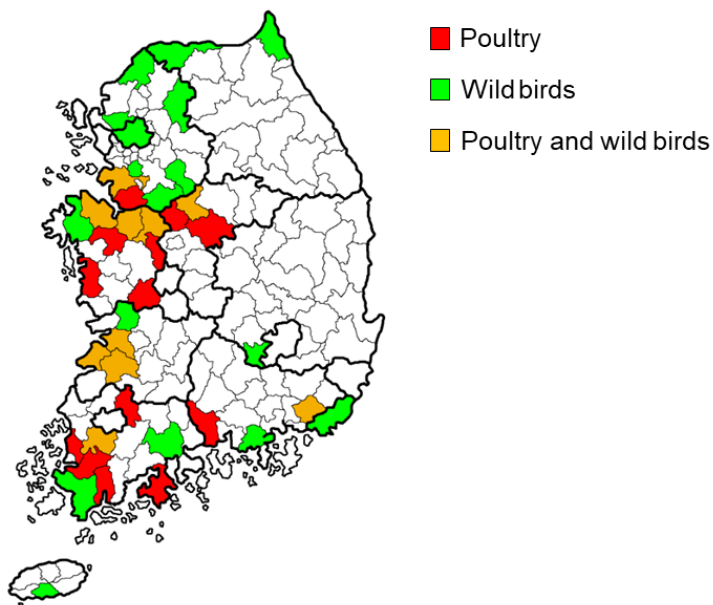

**Figure S1.** H5N1 high pathogenicity avian influenza viruses isolated from wild birds and poultry in Korea during the 2021–2022 winter season by date (A) and by region (B). Each bar represents the number of H5N1 HPAI viruses isolated each week (red, poultry; green, wild birds) (A). Geographic depiction of the region in Korea where H5N1 HPAI viruses were detected in poultry (red), wild birds (green), or both poultry and wild birds (yellow) (B). Data were obtained from the Korean Animal Health Integrated System (KAHIS) and Ministry of Agriculture, Food and Rural Affairs of Korea webpage ([www.mafra.go.kr/FMD-AI2](http://www.mafra.go.kr/FMD-AI2)).
