# Supplementary material for: Genetic Characterization and Pathogenesis of H5N1 High Pathogenicity Avian Influenza Virus Isolated in South Korea during 2021–2022
Source: MDPI journal article supplement (doi:10.3390/v15061403), 2023-06-20
Supplement: s1 [file s1]

(A) PB2

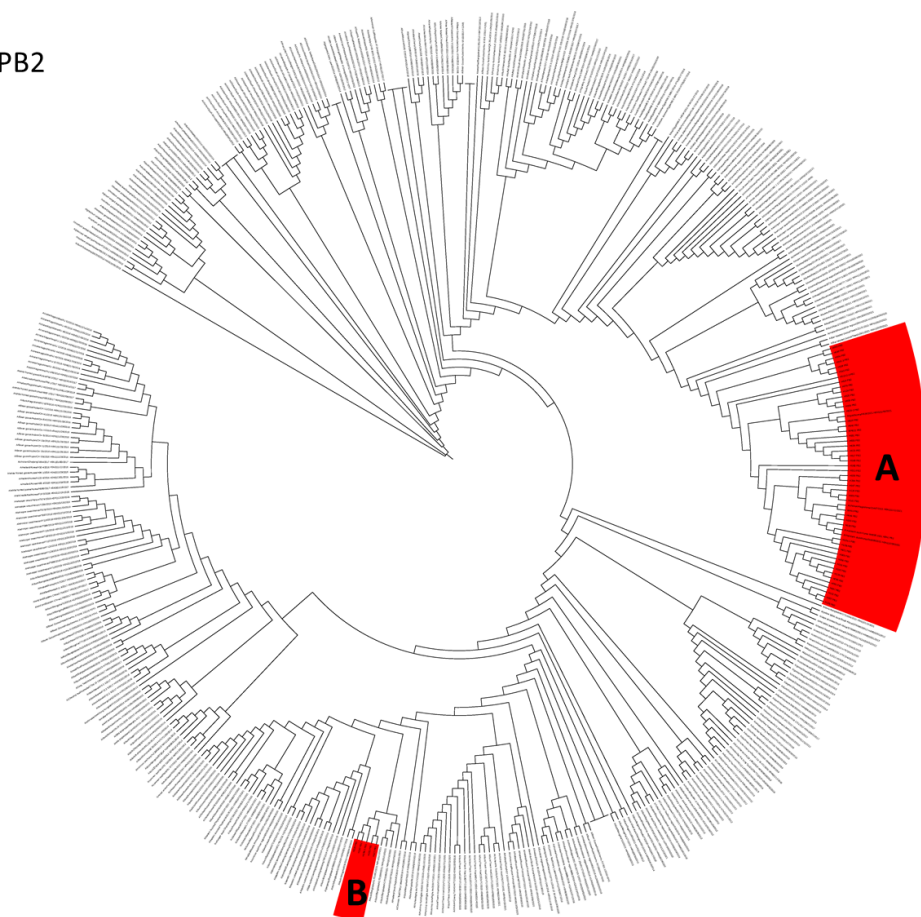

(B) PB1

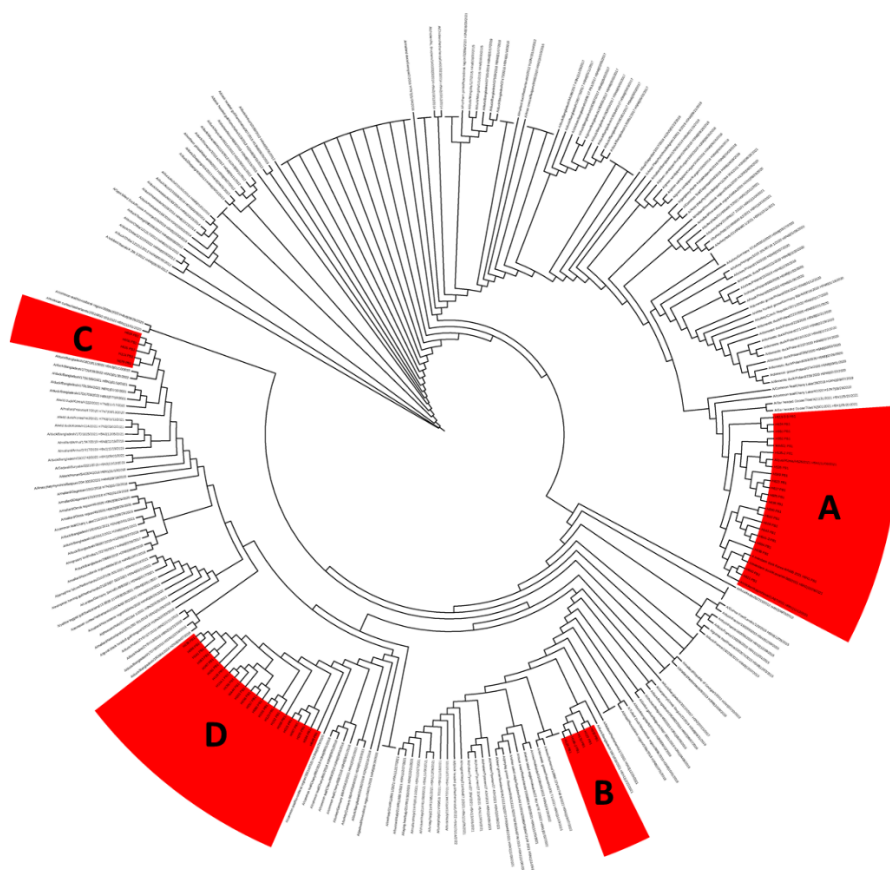

(C) PA

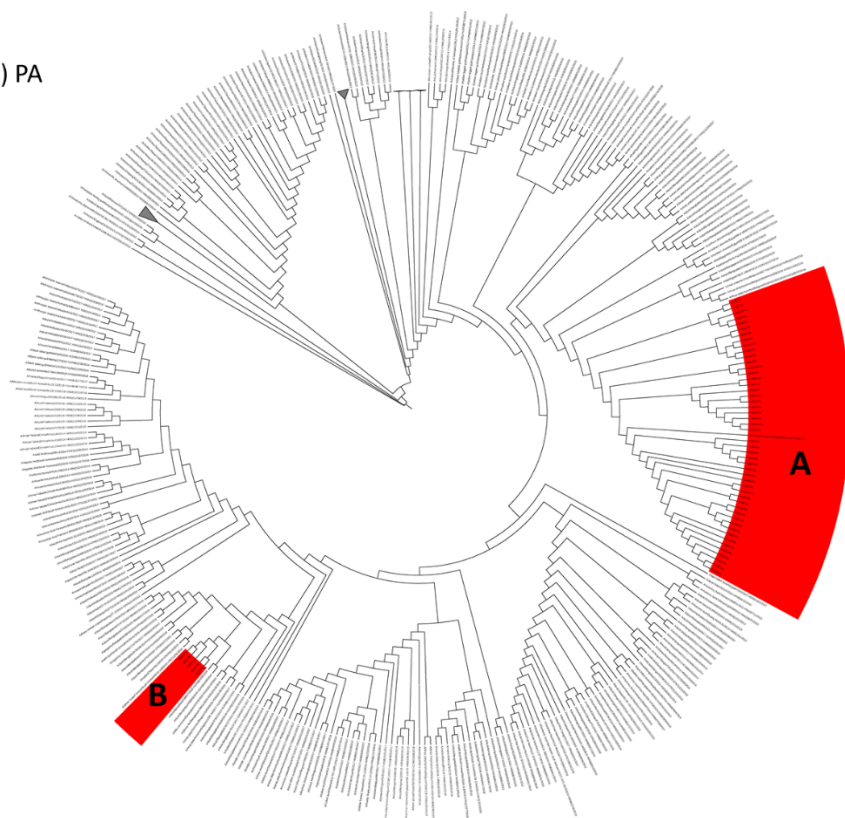

(D) NP

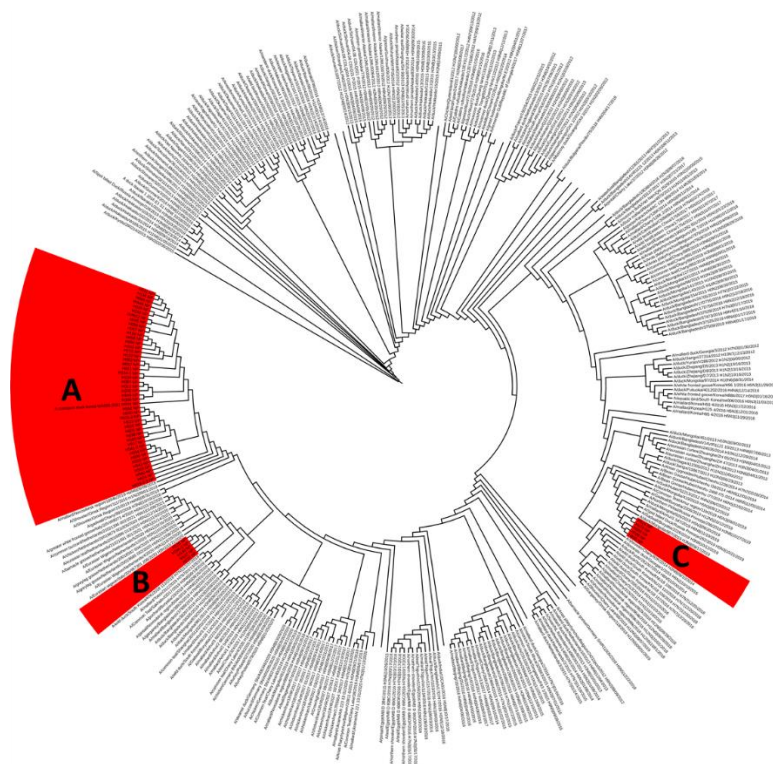

(E) MP

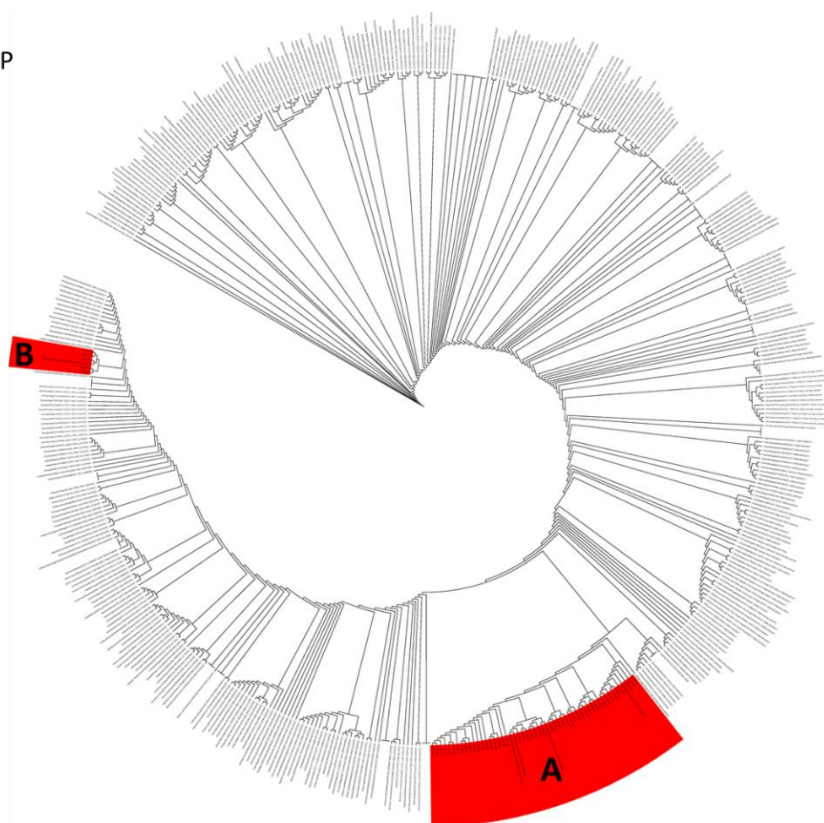

(F) NS

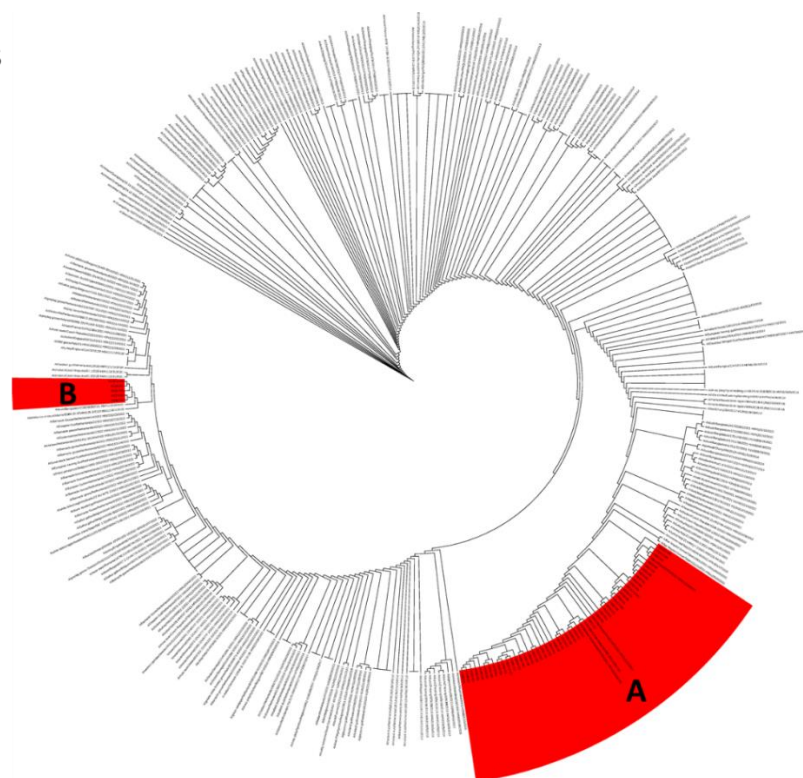

**Figure S2.** Maximum likelihood (ML) phylogenetic tree of PB2 (A), PB1 (B), PA (C), NP (D), MP (E), and NS (F) genes.
