# Supplementary material for: Genetic Characterization and Pathogenesis of H5N1 High Pathogenicity Avian Influenza Virus Isolated in South Korea during 2021–2022
Source: MDPI journal article supplement (doi:10.3390/v15061403), 2023-06-20
Supplement: s1 [file s1]

Table S1. Clade 2.3.4.4b H5N1 highly pathogenic avian influenza viruses isolated in this study

| Host      |               | Virus name                       | Collection date | Region | Genetic group | Sample type | latitude   | longitude   | Cleavage site | GISAID PB2 accession | GISAID PB1 accession | GISAID PA accession | GISAID HA accession | GISAID NP accession | GISAID NA accession | GISAID MP accession | GISAID NS accession |
|-----------|---------------|----------------------------------|-----------------|--------|---------------|-------------|------------|-------------|---------------|----------------------|----------------------|---------------------|---------------------|---------------------|---------------------|---------------------|---------------------|
| Wild bird | Mandarin Duck | A/mandarin duck/Korea/WA585/2021 | 2021-10-26      | CN     | I             | Swab        | 36°44'56"N | 127°7'37"E  | PLRERRRKR*GLF | EPI2205104           | EPI2205103           | EPI2205102          | EPI2205101          | EPI2205100          | EPI2205099          | EPI2205098          | EPI2205097          |
|           | Mandarin Duck | A/mandarin duck/Korea/H519/2021  | 2021-11-05      | JB     | I             | Feces       | 35°37'26"N | 126°51'40"E | PLRERRRKR*GLF | EPI2540373           | EPI2540374           | EPI2540372          | EPI2540376          | EPI2540369          | EPI2540375          | EPI2540371          | EPI2540370          |
|           | Mandarin Duck | A/mandarin duck/Korea/WA622/2021 | 2021-11-09      | JB     | I             | Swab        | 35°40'38"N | 126°53'30"E | PLRERRRKR*GLF | EPI2540381           | EPI2540382           | EPI2540380          | EPI2540384          | EPI2540377          | EPI2540383          | EPI2540379          | EPI2540378          |
|           | Mandarin Duck | A/mandarin duck/Korea/H552/2021  | 2021-11-15      | GG     | I             | Feces       | 37°13'49"N | 127°26'28"E | PLRERRRKR*GLF | EPI2540389           | EPI2540390           | EPI2540388          | EPI2540392          | EPI2540385          | EPI2540391          | EPI2540387          | EPI2540386          |
|           | Mallard       | A/mallard/Korea/WA44/2022        | 2022-01-13      | CN     | II            | Swab        | 36°48'32"N | 126°58'25"E | PLRERRRKR*GLF | EPI2540397           | EPI2540398           | EPI2540396          | EPI2540400          | EPI2540393          | EPI2540399          | EPI2540395          | EPI2540394          |
|           | Wild duck     | A/wild duck/Korea/H152/2022      | 2022-02-08      | GG     | II            | Feces       | 37°12'53"N | 127°1'10"E  | PLRERRRKR*GLF | EPI2540405           | EPI2540406           | EPI2540404          | EPI2540408          | EPI2540401          | EPI2540407          | EPI2540403          | EPI2540402          |
| Poultry   | Quail         | A/quail/Korea/H526/2021          | 2021-11-09      | CB     | I             | Organ       | 36°59'28"N | 127°32'41"E | PLRERRRKR*GLF | EPI1938269           | EPI1938270           | EPI1938271          | EPI1938272          | EPI1938273          | EPI1938274          | EPI1938275          | EPI1938276          |
|           | Duck          | A/duck/Korea/H535-2/2021         | 2021-11-10      | CB     | I             | Organ       | 36°59'7"N  | 127°32'8"E  | PLRERRRKR*GLF | EPI2540413           | EPI2540414           | EPI2540412          | EPI2540416          | EPI2540409          | EPI2540415          | EPI2540411          | EPI2540410          |
|           | Duck          | A/duck/Korea/H541-3/2021         | 2021-11-11      | JN     | I             | Organ       | 34°54'39"N | 126°43'4"E  | PLRERRRKR*GLF | EPI2540421           | EPI2540422           | EPI2540420          | EPI2540424          | EPI2540417          | EPI2540423          | EPI2540419          | EPI2540418          |
|           | Duck          | A/duck/Korea/H543/2021           | 2021-11-14      | CB     | I             | Organ       | 37°0'7"N   | 127°34'15"E | PLRERRRKR*GLF | EPI2540781           | EPI2540782           | EPI2540780          | EPI2540784          | EPI2540777          | EPI2540783          | EPI2540779          | EPI2540778          |
|           | Duck          | A/duck/Korea/H550/2021           | 2021-11-16      | JN     | I             | Organ       | 34°29'58"N | 126°41'38"E | PLRERRRKR*GLF | EPI2540429           | EPI2540430           | EPI2540428          | EPI2540432          | EPI2540425          | EPI2540431          | EPI2540427          | EPI2540426          |
|           | Duck          | A/duck/Korea/H554/2021           | 2021-11-17      | JN     | I             | Organ       | 34°55'23"N | 126°43'1"E  | PLRERRRKR*GLF | EPI2540437           | EPI2540438           | EPI2540436          | EPI2540440          | EPI2540433          | EPI2540439          | EPI2540435          | EPI2540434          |
|           | Chicken       | A/chicken/Korea/H559/2021        | 2021-11-21      | CB     | I             | Organ       | 36°59'29"N | 127°33'46"E | PLRERRRKR*GLF | EPI2540445           | EPI2540446           | EPI2540444          | EPI2540448          | EPI2540441          | EPI2540447          | EPI2540443          | EPI2540442          |
|           | Duck          | A/duck/Korea/H560/2021           | 2021-11-22      | JN     | I             | Organ       | 35°14'40"N | 127°0'47"E  | PLRERRRKR*GLF | EPI2540453           | EPI2540454           | EPI2540452          | EPI2540456          | EPI2540449          | EPI2540455          | EPI2540451          | EPI2540450          |
|           | Chicken       | A/chicken/Korea/H589/2021        | 2021-12-04      | CN     | I             | Organ       | 36°45'5"N  | 127°6'53"E  | PLRERRRKR*GLF | EPI2540461           | EPI2540462           | EPI2540460          | EPI2540464          | EPI2540457          | EPI2540463          | EPI2540459          | EPI2540458          |
|           | Chicken       | A/chicken/Korea/H590/2021        | 2021-12-05      | JN     | I             | Organ       | 34°44'35"N | 126°27'42"E | PLRERRRKR*GLF | EPI2540469           | EPI2540470           | EPI2540468          | EPI2540472          | EPI2540465          | EPI2540471          | EPI2540467          | EPI2540466          |
|           | Chicken       | A/chicken/Korea/H605/2021        | 2021-12-11      | CN     | I             | Organ       | 36°43'41"N | 127°8'49"E  | PLRERRRKR*GLF | EPI2540477           | EPI2540478           | EPI2540476          | EPI2540480          | EPI2540473          | EPI2540479          | EPI2540475          | EPI2540474          |
|           | Duck          | A/duck/Korea/H608/2021           | 2021-12-13      | JN     | III           | Organ       | 34°52'6"N  | 126°32'4"E  | PLRERRRKR*GLF | EPI2540485           | EPI2540486           | EPI2540484          | EPI2540488          | EPI2540481          | EPI2540487          | EPI2540483          | EPI2540482          |
|           | Duck          | A/duck/Korea/H609/2021           | 2021-12-13      | JN     | III           | Organ       | 34°52'9"N  | 126°32'6"E  | PLRERRRKR*GLF | EPI2540493           | EPI2540494           | EPI2540492          | EPI2540496          | EPI2540489          | EPI2540495          | EPI2540491          | EPI2540490          |
|           | Chicken       | A/chicken/Korea/H617/2021        | 2021-12-14      | CN     | I             | Organ       | 36°51'28"N | 126°59'51"E | PLRERRRKR*GLF | EPI2540501           | EPI2540502           | EPI2540500          | EPI2540504          | EPI2540497          | EPI2540503          | EPI2540499          | EPI2540498          |
|           | Duck          | A/duck/Korea/H621/2021           | 2021-12-15      | JN     | I             | Organ       | 34°54'5"N  | 126°41'9"E  | PLRERRRKR*GLF | EPI2540509           | EPI2540510           | EPI2540508          | EPI2540512          | EPI2540505          | EPI2540511          | EPI2540507          | EPI2540506          |
|           | Chicken       | A/chicken/Korea/H623/2021        | 2021-12-16      | SJ     | I             | Organ       | 36°33'29"N | 127°18'33"E | PLRERRRKR*GLF | EPI2540517           | EPI2540518           | EPI2540516          | EPI2540520          | EPI2540513          | EPI2540519          | EPI2540515          | EPI2540514          |
|           | Quail         | A/quail/Korea/H624/2021          | 2021-12-17      | GG     | I             | Organ       | 37°48'30"N | 126°53'45"E | PLRERRRKR*GLF | EPI2540525           | EPI2540526           | EPI2540524          | EPI2540528          | EPI2540521          | EPI2540527          | EPI2540523          | EPI2540522          |
|           | Chicken       | A/chicken/Korea/H625/2021        | 2021-12-20      | JN     | III           | Organ       | 34°50'8"N  | 126°34'34"E | PLRERRRKR*GLF | EPI2540533           | EPI2540534           | EPI2540532          | EPI2540536          | EPI2540529          | EPI2540535          | EPI2540531          | EPI2540530          |
|           | Chicken       | A/chicken/Korea/H638/2021        | 2021-12-23      | SJ     | I             | Organ       | 36°30'44"N | 127°22'35"E | PLRERRRKR*GLF | EPI2540541           | EPI2540542           | EPI2540540          | EPI2540544          | EPI2540537          | EPI2540543          | EPI2540539          | EPI2540538          |
|           | Duck          | A/duck/Korea/H640/2021           | 2021-12-27      | JB     | I             | Organ       | 35°35'24"N | 126°35'22"E | PLRERRRKR*GLF | EPI2540549           | EPI2540550           | EPI2540548          | EPI2540552          | EPI2540545          | EPI2540551          | EPI2540547          | EPI2540546          |
|           | Duck          | A/duck/Korea/H649/2021           | 2021-12-29      | JN     | II            | Organ       | 34°49'53"N | 126°29'59"E | PLRERRRKR*GLF | EPI2540557           | EPI2540558           | EPI2540556          | EPI2540560          | EPI2540553          | EPI2540559          | EPI2540555          | EPI2540554          |
|           | Duck          | A/duck/Korea/H13/2022            | 2022-01-06      | JB     | II            | Organ       | 35°40'26"N | 126°54'2"E  | PLRERRRKR*GLF | EPI2540565           | EPI2540566           | EPI2540564          | EPI2540568          | EPI2540561          | EPI2540567          | EPI2540563          | EPI2540562          |

|                       |                                         |            |    |     |       |            |             |               |            |            |            |            |            |            |            |            |
|-----------------------|-----------------------------------------|------------|----|-----|-------|------------|-------------|---------------|------------|------------|------------|------------|------------|------------|------------|------------|
| Duck                  | A/duck/Korea/H38/2022                   | 2022-01-14 | JN | I   | Organ | 34°47'33"N | 126°36'11"E | PLRERRRKR*GLF | EPI2540573 | EPI2540574 | EPI2540572 | EPI2540576 | EPI2540569 | EPI2540575 | EPI2540571 | EPI2540570 |
| Duck                  | A/duck/Korea/H56/2022                   | 2022-01-21 | CB | II  | Organ | 36°57'8"N  | 127°26'33"E | PLRERRRKR*GLF | EPI2540581 | EPI2540582 | EPI2540580 | EPI2540584 | EPI2540577 | EPI2540583 | EPI2540579 | EPI2540578 |
| Chicken               | A/chicken/Korea/H57/2022                | 2022-01-21 | GG | II  | Organ | 37°5'11"N  | 126°52'51"E | PLRERRRKR*GLF | EPI2540589 | EPI2540590 | EPI2540588 | EPI2540592 | EPI2540585 | EPI2540591 | EPI2540587 | EPI2540586 |
| Chicken               | A/chicken/Korea/H58/2022                | 2022-01-21 | GG | II  | Organ | 37°10'20"N | 126°51'16"E | PLRERRRKR*GLF | EPI2540597 | EPI2540598 | EPI2540596 | EPI2540600 | EPI2540593 | EPI2540599 | EPI2540595 | EPI2540594 |
| Chicken               | A/chicken/Korea/H63/2022                | 2022-01-24 | CN | II  | Organ | 36°43'47"N | 127°6'59"E  | PLRERRRKR*GLF | EPI2540605 | EPI2540606 | EPI2540604 | EPI2540608 | EPI2540601 | EPI2540607 | EPI2540603 | EPI2540602 |
| Duck                  | A/duck/Korea/H79/2022                   | 2022-01-25 | JB | III | Organ | 35°41'47"N | 126°43'0"E  | PLRERRRKR*GLF | EPI2540613 | EPI2540614 | EPI2540612 | EPI2540616 | EPI2540609 | EPI2540615 | EPI2540611 | EPI2540610 |
| Duck                  | A/duck/Korea/H87/2022                   | 2022-01-29 | JB | II  | Organ | 35°45'25"N | 126°59'21"E | PLRERRRKR*GLF | EPI2540621 | EPI2540622 | EPI2540620 | EPI2540624 | EPI2540617 | EPI2540623 | EPI2540619 | EPI2540618 |
| Chicken               | A/chicken/Korea/H88/2022                | 2022-01-30 | CN | II  | Organ | 36°45'32"N | 126°50'11"E | PLRERRRKR*GLF | EPI2540629 | EPI2540630 | EPI2540628 | EPI2540632 | EPI2540625 | EPI2540631 | EPI2540627 | EPI2540626 |
| Duck                  | A/duck/Korea/H90/2022                   | 2022-01-31 | CB | II  | Organ | 36°54'44"N | 127°27'4"E  | PLRERRRKR*GLF | EPI2540637 | EPI2540638 | EPI2540636 | EPI2540640 | EPI2540633 | EPI2540639 | EPI2540635 | EPI2540634 |
| Chicken               | A/chicken/Korea/H91/2022                | 2022-02-02 | CN | II  | Organ | 36°57'46"N | 127°6'38"E  | PLRERRRKR*GLF | EPI2540645 | EPI2540646 | EPI2540644 | EPI2540648 | EPI2540641 | EPI2540647 | EPI2540643 | EPI2540642 |
| Korean native chicken | A/Korean native chicken/Korea/H97/2022  | 2022-02-03 | CN | II  | Organ | 36°43'52"N | 127°8'14"E  | PLREKRRKR*GLF | EPI2540653 | EPI2540654 | EPI2540652 | EPI2540656 | EPI2540649 | EPI2540655 | EPI2540651 | EPI2540650 |
| Chicken               | A/chicken/Korea/H124/2022               | 2022-02-04 | JB | III | Organ | 35°41'24"N | 126°43'8"E  | PLRGKRRKR*GLF | EPI2540661 | EPI2540662 | EPI2540660 | EPI2540664 | EPI2540657 | EPI2540663 | EPI2540659 | EPI2540658 |
| Duck                  | A/duck/Korea/H125/2022                  | 2022-02-05 | JB | IV  | Organ | 35°39'30"N | 126°45'58"E | PLRERRRKR*GLF | EPI2205112 | EPI2205111 | EPI2205110 | EPI2205109 | EPI2205108 | EPI2205107 | EPI2205106 | EPI2205105 |
| Korean native chicken | A/Korean native chicken/Korea/H127/2022 | 2022-02-06 | CN | IV  | Organ | 36°27'28"N | 126°34'1"E  | PLRERRRKR*GLF | EPI2540669 | EPI2540670 | EPI2540668 | EPI2540672 | EPI2540665 | EPI2540671 | EPI2540667 | EPI2540666 |
| Duck                  | A/duck/Korea/H128/2022                  | 2022-02-07 | CB | II  | Organ | 36°53'52"N | 127°28'6"E  | PLREKRRKR*GLF | EPI2540677 | EPI2540678 | EPI2540676 | EPI2540680 | EPI2540673 | EPI2540679 | EPI2540675 | EPI2540674 |
| Chicken               | A/chicken/Korea/H129/2022               | 2022-02-07 | GG | II  | Organ | 37°6'26"N  | 127°0'38"E  | PLRERRRKR*GLF | EPI2540685 | EPI2540686 | EPI2540684 | EPI2540688 | EPI2540681 | EPI2540687 | EPI2540683 | EPI2540682 |
| Chicken               | A/chicken/Korea/H130/2022               | 2022-02-07 | JB | IV  | Organ | 35°34'5"N  | 126°45'55"E | PLRERRRKR*GLF | EPI2540693 | EPI2540694 | EPI2540692 | EPI2540696 | EPI2540689 | EPI2540695 | EPI2540691 | EPI2540690 |
| Duck                  | A/duck/Korea/H138/2022                  | 2022-02-08 | CB | II  | Organ | 36°46'40"N | 127°24'45"E | PLRERRRKR*GLF | EPI2540701 | EPI2540702 | EPI2540700 | EPI2540704 | EPI2540697 | EPI2540703 | EPI2540699 | EPI2540698 |
| Quail                 | A/quail/Korea/H139/2022                 | 2022-02-08 | CN | II  | Organ | 36°45'52"N | 126°45'4"E  | PLRERRRKR*GLF | EPI2540709 | EPI2540710 | EPI2540708 | EPI2540712 | EPI2540705 | EPI2540711 | EPI2540707 | EPI2540706 |
| Chicken               | A/chicken/Korea/H141/2022               | 2022-02-09 | CN | II  | Organ | 36°47'19"N | 126°55'54"E | PLRERRRKR*GLF | EPI2540717 | EPI2540718 | EPI2540716 | EPI2540720 | EPI2540713 | EPI2540719 | EPI2540715 | EPI2540714 |
| Duck                  | A/duck/Korea/H153/2022                  | 2022-02-12 | CB | II  | Organ | 36°52'29"N | 127°54'18"E | PLRERRRKR*GLF | EPI2540725 | EPI2540726 | EPI2540724 | EPI2540728 | EPI2540721 | EPI2540727 | EPI2540723 | EPI2540722 |
| Chicken               | A/chicken/Korea/H154-1/2022             | 2022-02-13 | CN | II  | Organ | 36°46'28"N | 126°45'6"E  | PLREKRRKR*GLF | EPI2540733 | EPI2540734 | EPI2540732 | EPI2540736 | EPI2540729 | EPI2540735 | EPI2540731 | EPI2540730 |
| Chicken               | A/chicken/Korea/H155/2022               | 2022-02-12 | CB | II  | Organ | 36°53'31"N | 127°28'6"E  | PLRERRRKR*GLF | EPI2540741 | EPI2540742 | EPI2540740 | EPI2540744 | EPI2540737 | EPI2540743 | EPI2540739 | EPI2540738 |
| Duck                  | A/duck/Korea/H196/2022                  | 2022-02-18 | CN | IV  | Organ | 36°5'53"N  | 127°5'55"E  | PLRGKRRKR*GLF | EPI2540749 | EPI2540750 | EPI2540748 | EPI2540752 | EPI2540745 | EPI2540751 | EPI2540747 | EPI2540746 |
| Duck                  | A/duck/Korea/H200/2022                  | 2022-02-21 | GN | II  | Organ | 35°3'26"N  | 127°55'1"E  | PLRERRRKR*GLF | EPI2540757 | EPI2540758 | EPI2540756 | EPI2540760 | EPI2540753 | EPI2540759 | EPI2540755 | EPI2540754 |
| Duck                  | A/duck/Korea/H232/2022                  | 2022-03-02 | JN | IV  | Organ | 34°44'4"N  | 127°21'3"E  | PLRERRRKR*GLF | EPI2540765 | EPI2540766 | EPI2540764 | EPI2540768 | EPI2540761 | EPI2540767 | EPI2540763 | EPI2540762 |
| Chicken               | A/chicken/Korea/H384/2022               | 2022-04-07 | GN | II  | Organ | 35°17'5"N  | 128°49'50"E | PLRERRRKR*GLF | EPI2540773 | EPI2540774 | EPI2540772 | EPI2540776 | EPI2540769 | EPI2540775 | EPI2540771 | EPI2540770 |

JB, Jeonbuk; JN, Jeonnam; GG, Gyeonggi; CB, Chungbuk; CN, Chungnam; SJ, Sejong
