# Supplementary material for: Genetic Characterization and Pathogenesis of H5N1 High Pathogenicity Avian Influenza Virus Isolated in South Korea during 2021–2022
Source: Viruses. 2023 Jun 20;15(6):1403. doi: 10.3390/v15061403 (PMC10304347; doi:10.3390/v15061403)
Supplement: Supplementary file 1 [file viruses-15-01403-s001.zip]

Archive with 4 entries (4 files):
- Supplemantary Figures and tables_230526/Table S2 The reference virus list for HA and NA gene analysis.xlsx
- Supplemantary Figures and tables_230526/Figure S1.pdf
- Supplemantary Figures and tables_230526/Table S1.pdf
- Supplemantary Figures and tables_230526/Figure S2.pdf
