# Supplementary material for: Genetic Characterization and Pathogenesis of H5N1 High Pathogenicity Avian Influenza Virus Isolated in South Korea during 2021–2022
Source: Viruses. 2023 Jun 20;15(6):1403. doi: 10.3390/v15061403 (PMC10304347; doi:10.3390/v15061403)
Supplement: Supplementary file 1 [file viruses-15-01403-s001.zip › Supplemantary Figures and tables_230526/Table S2 The reference virus list for HA and NA gene analysis.xlsx]

## Sheet: HA 
We gratefully acknowledge the following Authors from the Originating laboratories responsible for obtaining the specimens and the Submitting laboratories where genetic sequence data were generated and shared via the GISAID Initiative, on which this research is based. All submitters of data may be contacted directly via www.gisaid.org 1 Shu, Y., McCauley, J. (2017) GISAID: from vision to reality E…
Virus name	Accession No.	Collected
A/common buzzard/Netherlands/21021396-002/2021 H5N1|01/09/2021	EPI_ISL_1048240	2021-01-09
A/chicken/Kostroma/304-10/2020 H5N8|10/17/2020	EPI_ISL_1114745	2020-10-17
A/chicken/England/043683/2020 H5N8|12/17/2020	EPI_ISL_1123350	2020-12-17
A/chicken/Germany-BB/AI06242/2021 H5N1|11/02/2021	EPI_ISL_11725988	2021-11-02
A/greylag goose/Netherlands/22006190-002/2022 H5N1|03/28/2022	EPI_ISL_12069978	2022-03-28
A/Chicken/Sweden/SVA210302SZ0564/KN052345-IP12/2021 H5N5|03/02/2021	EPI_ISL_1238195	2021-03-02
A/duck/Hubei/SE220/2022 H5N1|01/10/2022	EPI_ISL_12572659	2022-01-10
A/goose/Hunan/SE284/2022(H5N1)|A / H5N1|01/05/2022	EPI_ISL_12572662	2022-01-05
A/Fancy chicken/NL/FAV-0035/2021 H5N1|12/17/2021	EPI_ISL_12968592	2021-12-17
A/emu/NL/FAV-0035-12/2021 H5N1|12/17/2021	EPI_ISL_12968817	2021-12-17
A/duck/Bangladesh/19D1819/2021 H5N1|12/22/2021	EPI_ISL_13243698	2021-12-22
A/duck/Israel/589/2021 H5N1|11/18/2021	EPI_ISL_13618384	2021-11-18
A/crow/Hokkaido/0102F043/2022 H5N1|02/07/2022	EPI_ISL_14064803	2022-02-07
A/duck/Korea/H125/2022 H5N1|2/5/2022	EPI_ISL_15647837	2022-02-05
A/barnacle goose/Netherlands/21025769-002/2021 H5N1|03/22/2021	EPI_ISL_2174728	2021-03-22
A/Turkey/Hungary/16603/2021 H5N1|04/13/2021	EPI_ISL_3135897	2021-04-13
A/chicken/Nigeria/VRD21-43 21VIR2288-4/2021 H5N8|02/10/2021	EPI_ISL_4061481	2021-02-10
A/chicken/Nigeria/VRD21-102 21VIR2370-424/2021 H5N1|03/01/2021	EPI_ISL_4061484	2021-03-01
A/chicken/Nigeria/VRD21-109 21VIR2370-425/2021 H5N1|03/01/2021	EPI_ISL_4061485	2021-03-01
A/greylag goose/Germany-SH/AI02191/2020 H5N8|10/31/2020	EPI_ISL_5058630	2020-10-31
A/kestrel/Germany-NI/AI03672/2020 H5N8|12/21/2020	EPI_ISL_5098135	2020-12-21
A/oystercatcher/Germany-NI/AI05047/2021 H5N1|07/17/2021	EPI_ISL_5145744	2021-07-17
A/turkey/Italy/21VIR8585-1/2021 H5N1|10/18/2021	EPI_ISL_5524384	2021-10-18
A/domestic goose/Kazakhstan/1 248 2 20 B/2020 H5N8|09/20/2020	EPI_ISL_615068	2020-09-20
A/chicken/Iraq/1/2020 H5N8|05/12/2020	EPI_ISL_623074	2020-05-12
A/greylag goose/Netherlands/20016879 001/2020 H5N8|11/01/2020	EPI_ISL_632318	2020-11-01
A/duck/Saratov/29804/2020 H5N8|09/15/2020	EPI_ISL_654824	2020-09-15
A/mallard/Italy/20VIR7139 73/2020 H5N8|11/14/2020	EPI_ISL_654958	2020-11-14
A/chicken/Poland/448/2020 H5N8|11/24/2020	EPI_ISL_661177	2020-11-24
A/chicken/France/20P016448/2020 H5N8|11/10/2020	EPI_ISL_667810	2020-11-10
A/hooded crane/Kagoshima/KU-5T/2021 H5N8|11/19/2021	EPI_ISL_6829497	2021-11-19
A/chicken/Kagoshima/21A6T/2021 H5N1|11/12/2021	EPI_ISL_6829533	2021-11-21
A/chicken/Kagoshima/B3T/2021 H5N8|11/14/2021	EPI_ISL_6829536	2021-11-14
A/mandarin duck/Korea/WA585/2021 H5N1|10/26/2021	EPI_ISL_6959592	2021-10-26
A/quail/Korea/H526/2021 H5N1|11/9/2021	EPI_ISL_6959593	2021-11-09
A/chicken/Russia Novosibirsk region/3 29/2020 H5N8|09/20/2020	EPI_ISL_739692	2020-09-20
A/Anser Brachyrhynchus Anser Anser/Belgium/13846/2020 H5N8|12/03/2020	EPI_ISL_7622619	2020-12-03
A/turkey/Poland/464/2020 H5N8 H5N8|12/01/2020	EPI_ISL_779129	2020-12-01
A/Bar-headed Goose/Tibet/XZ901/2021 H5N1|05/20/2021	EPI_ISL_8215688	2021-05-20
A/Bar-headed Goose/Tibet/XZ1131/2021 H5N1|05/20/2021	EPI_ISL_8215689	2021-05-20
A/turkey/Tyumen/81-96V/2021 H5N1|10/30/2021	EPI_ISL_8769033	2021-10-30
A/common buzzard/Denmark/14600-1/2020 H5N8|11/06/2020	EPI_ISL_984691	2020-11-06
A/duck/Korea/H411/2020 H5N8|12/08/2020	EPI_ISL_985184	2020-12-08
A/American wigeon/South Carolina/AH0195145/2021 H5N1|12/30/2021	EPI_ISL_9869760	2021-12-30
A/American blue-winged teal/South Carolina/AH0195150/2021 H5N1|12/30/2021	EPI_ISL_9876777	2021-12-30

## Sheet: NA 
We gratefully acknowledge the following Authors from the Originating laboratories responsible for obtaining the specimens and the Submitting laboratories where genetic sequence data were generated and shared via the GISAID Initiative, on which this research is based. All submitters of data may be contacted directly via www.gisaid.org 1 Shu, Y., McCauley, J. (2017) GISAID: from vision to reality E…
Virus name	Accession No.	Collected
A/Mallard/Netherlands/2/2022_H5N1|02/14/2022	EPI_ISL_10993074	2022-02-14
A/swan/Spain/4087-1_22VIR2142-1/2021_H5N1|12/22/2021	EPI_ISL_11259292	2021-12-22
A/swan/Romania/10656_22VIR2749-6/2022_H5N1|02/22/2022	EPI_ISL_11922820	2022-02-22
A/duck/Laos/NL-2072061/2020_H5N1|10/16/2020	EPI_ISL_1290965	2020-10-16
A/common_crane/Israel/670/2021_H5N1|12/15/2021	EPI_ISL_13068727	2021-12-15
A/duck/Bangladesh/17D1843/2022_H5N1|02/13/2022	EPI_ISL_13131033	2022-02-13
A/duck/Bangladesh/17D1873/2022_H5N1|03/06/2022	EPI_ISL_13175609	2022-03-06
A/duck/Bangladesh/19D1874/2022_H5N1|03/09/2022	EPI_ISL_13243350	2022-03-09
A/duck/Bangladesh/19D1817/2021_H5N1|12/22/2021	EPI_ISL_13243696	2021-12-22
A/common_kestel/Israel/49-2/2022_H5N1|01/02/2022	EPI_ISL_13658359	2022-01-02
A/chicken/East_Java/Av1955/2022_H5N1|03/05/2022	EPI_ISL_13690275	2022-03-05
A/duck/Bangladesh/31998/2017_H5N1|02/15/2017	EPI_ISL_306656	2017-02-15
A/duck/Vietnam/NCVD1584/2012_NIBRG-301_18_134/2018_H5N1|07/03/2018	EPI_ISL_314824	2018-07-03
A/Vietnam/1194/2004_NIBRG-14_18_136/2018_H5N1|07/10/2018	EPI_ISL_314984	2018-07-10
A/chicken/East_Java/Spg119/2018_H5N1|02/12/2018	EPI_ISL_365528	2018-02-12
A/duck/Sidenreng_Rappang/A07180110-11/2018_H5N1|08/15/2018	EPI_ISL_4061492	2018-08-15
A/mink/Eastern_China/0712/2018_H5N1|07/12/2018	EPI_ISL_502207	2018-07-12
A/greylag_goose_/Sweden/SVA211118SZ0354/FB004497/2021_H5N1|11/17/2021	EPI_ISL_7055384	2021-11-17
A/chicken/Czech_Republic/23404-2K/2021_H5N1|11/25/2021	EPI_ISL_7626484	2021-11-25
A/Eurasian_wigeon/Germany-SH/AI05951/2021_H5N1|10/14/2021	EPI_ISL_7753193	2021-10-14
A/turkey/Italy/21VIR8480-1/2021_H5N1|10/11/2021	EPI_ISL_7987337	2021-10-11
A/turkey/Italy/21VIR8540-82/2021_H5N1|10/16/2021	EPI_ISL_7987340	2021-10-16
A/turkey/Italy/21VIR9117-2/2021_H5N1|11/04/2021	EPI_ISL_7987342	2021-11-04
A/grey_heron/Czech_Republic/23608/2021_H5N1|11/28/2021	EPI_ISL_8515481	2021-11-28
A/duck/Bangladesh/17D1601/2021_H5N1|02/14/2021	EPI_ISL_9957422	2021-02-14
